# Supplementary material for: Myeloid differentiation 2 deficiency attenuates AngII-induced arterial vascular oxidative stress, inflammation, and remodeling
Source: publisher site journal article supplement (doi:10.18632/aging.202402), 2021-01-20
Supplement: Supplementary file [file aging-v13i3-202402-supplementary-material-SD1.pdf]

SUPPLEMENTARY FIGURES

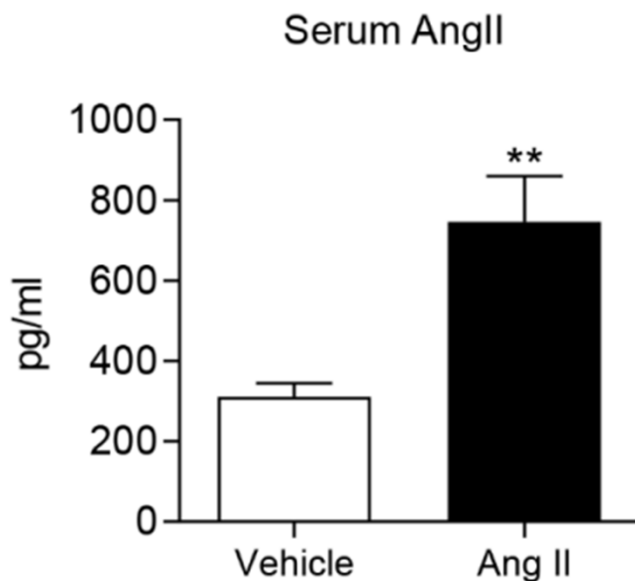

Supplementary Figure 1. AngII levels in serum of AngII-induced mice were detected by ELISA. (n = 10; \*\*P<0.01 compared to Vehicle).

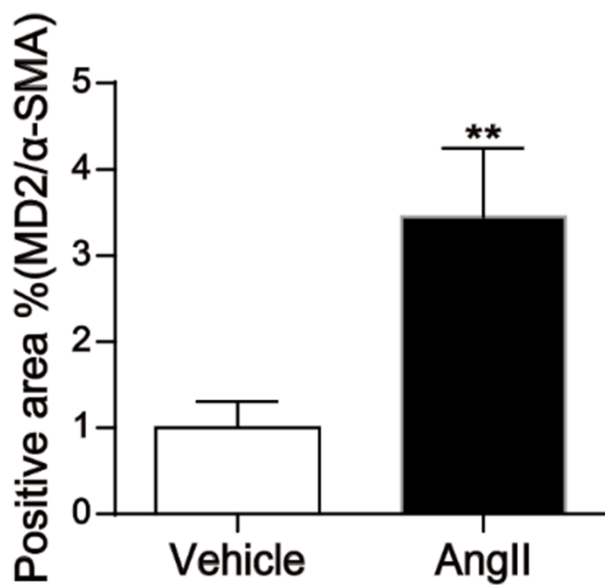

Supplementary Figure 2. Quantification for staining results in Figure 1C (n=8; \*\*P<0.01, compared to Vehicle).

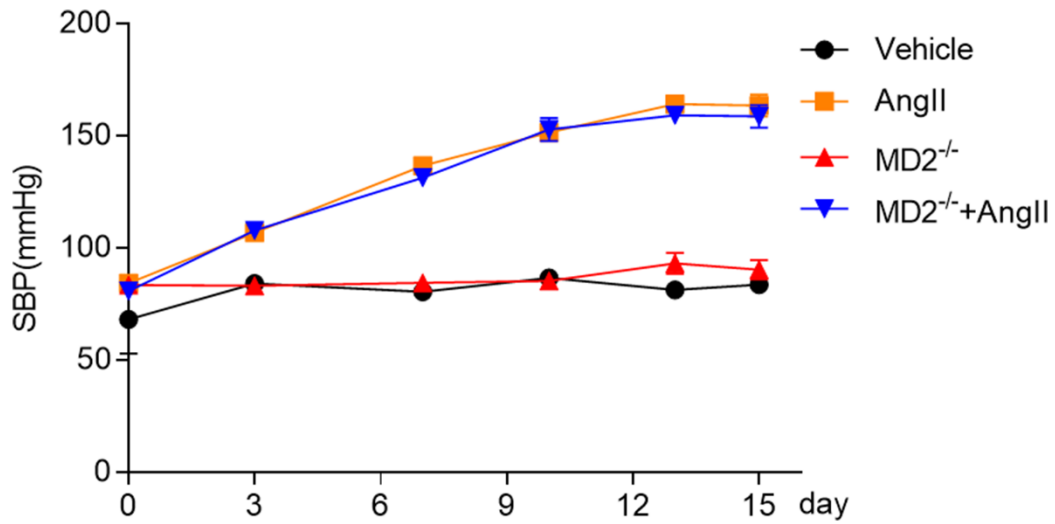

Supplementary Figure 3. Mice blood pressure were measured by tail-cuf using the telemetric blood pressure system every three days.

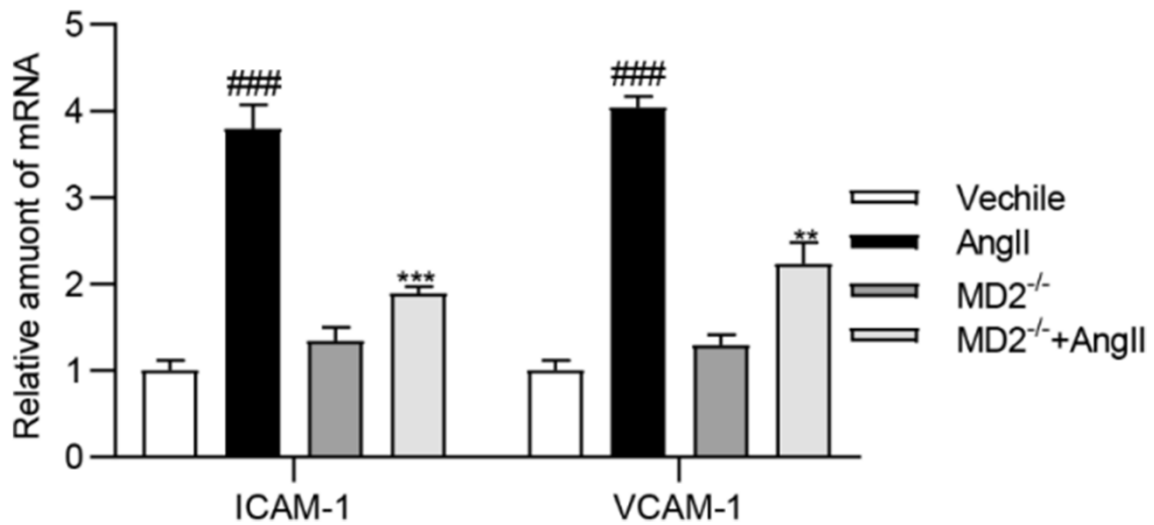

Supplementary Figure 4. MD2 deficiency alleviated Ang II induced ICAM-1 and VCAM-1 transcription in mouse aortas. ICAM-1 and VCAM-1 mRNA levels in the aortas were detected using real-time qPCR assay (n = 10 per group; ###p<0.001 compared to Vehicle; \*\*p<0.01 and \*\*\*p<0.0001 compared to Ang II).

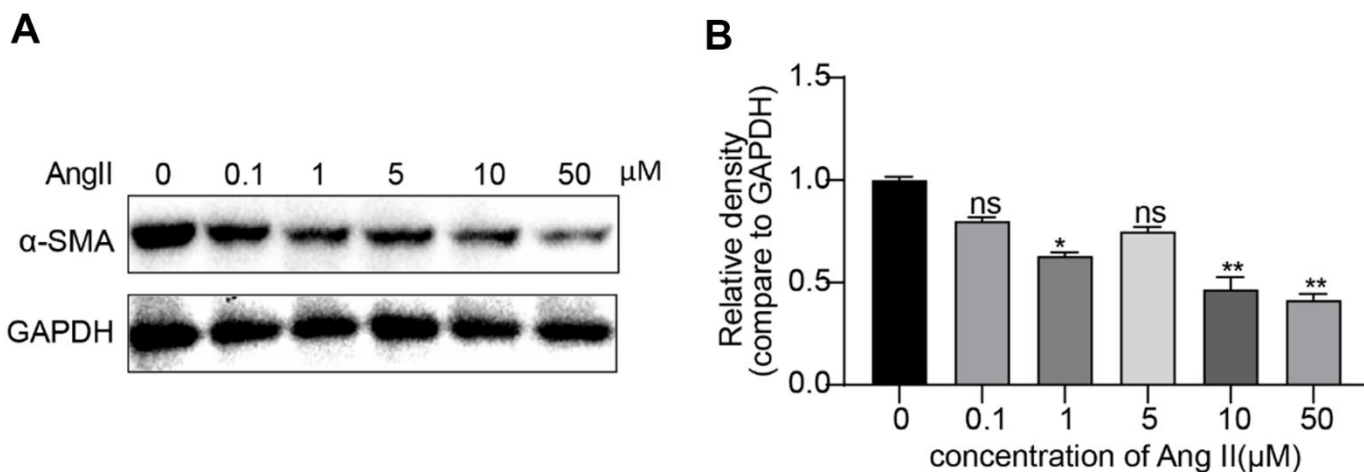

**Supplementary Figure 5.** (A) VSMCs were treated with indicated doses of Ang II for 24 h. The level of  $\alpha$ -SMA was detected by western blot. (B) Densitometric quantification for panel A (n=3; \*P<0.05, \*\*P<0.01, compared to 0).

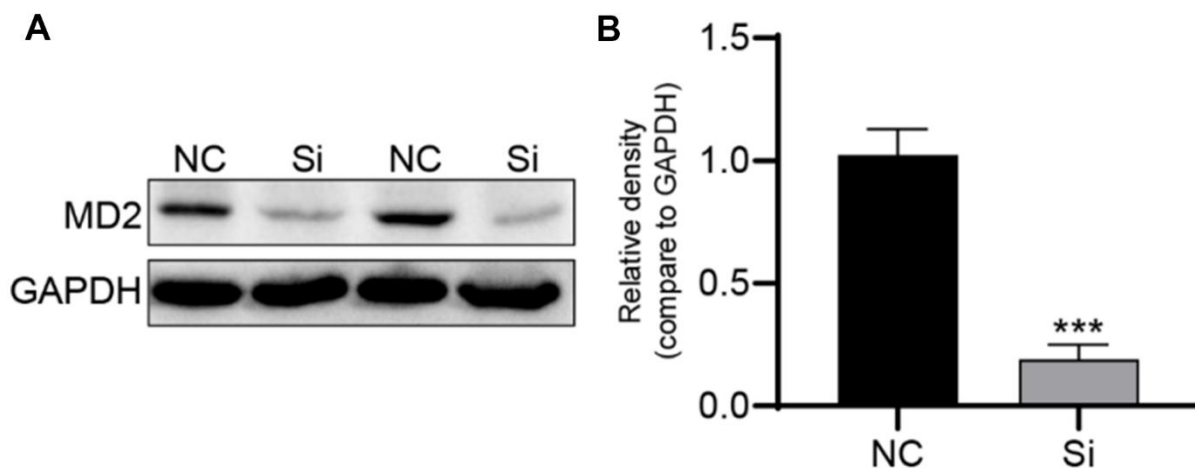

**Supplementary Figure 6.** (A) VSMCs were transfected with siRNA against MD2 for 6 h and then detected expression of MD2 by western blot (two representative data were shown from 3 independent experiments). (B) Densitometric quantification for panel A (NC, negative control sequence; Si, siRNA against MD2; n=3; \*\*\*P<0.001, compared to NC).

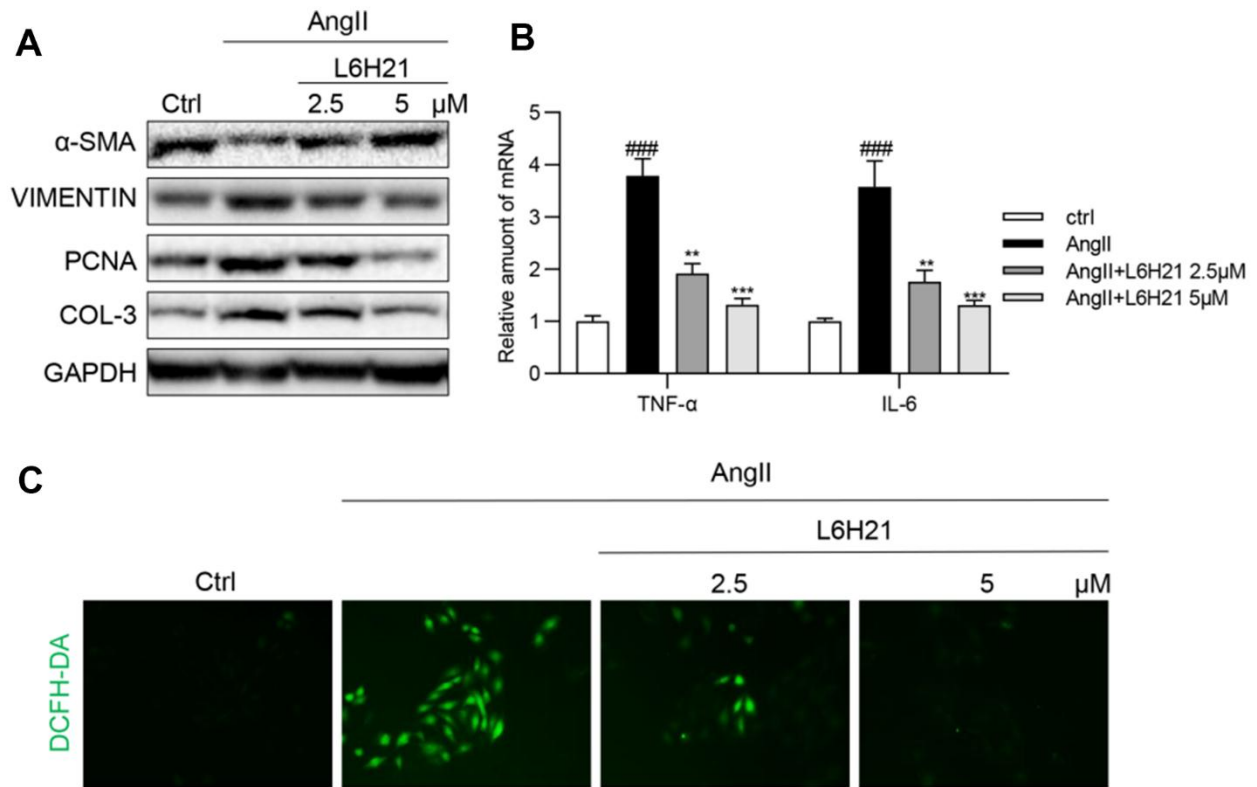

**Supplementary Figure 7. MD2 inhibitor L6H21 prevents Ang II-induced injuries in VSMCs.** VSMCs were treated with L6H21 (2.5 or 5 $\mu\text{M}$ ) for 1 hour and then exposed to AngII (10 $\mu\text{g}/\text{mL}$ ) for 24 h (in panels A), 6 h (in panels B), or 12 h (in panels C). (A) Expressions of  $\alpha$ -SMA, Vimentin, COL-3 and PCNA in cell lysates were detected by western blot analysis. (B) The levels of TNF- $\alpha$  and IL-6 mRNA were detected using real-time qPCR assay. (C) Superoxide production was measured by DCFH-DA staining (green) (scale bar = 50  $\mu\text{m}$ ). Representative blots and images were shown from 3 independent experiments; ### $p$ <0.001 compared to Ctrl; \*\* $p$ <0.01 and \*\*\* $p$ <0.001 compared to Ang II.
